# Supplementary material for: Synthesis of mesoporous Fe3Si aerogel as a photo-thermal material for highly efficient and stable corrosive-water evaporation
Source: Royal Society of Chemistry journal article supplement (doi:10.1039/c8ta08259f), 2018-01-01
Supplement: c8ta08259f1.pdf [file c8ta08259f1.pdf]

## Electronic Supplementary Information

### **Synthesis of mesoporous Fe<sub>3</sub>Si aerogel as a photo-thermal material for highly efficient and stable corrosive-water evaporation**

Fengyu Zhang,<sup>a</sup> Yaguang Li,<sup>\*a</sup> Xianhua Bai,<sup>a</sup> Shufang Wang,<sup>a</sup> Baolai Liang,<sup>a</sup> Guangsheng Fu,<sup>a</sup>  
Zhong-Shuai Wu<sup>\*b</sup>

*a Hebei Key Lab of Optic-electronic Information and Materials, The College of  
Physics Science and Technology, Hebei University, Baoding, 071002, China.*

*b Dalian National Laboratory for Clean Energy, Dalian Institute of Chemical Physics,  
Chinese Academy of Sciences, 457 Zhongshan Road, Dalian 116023, China.*

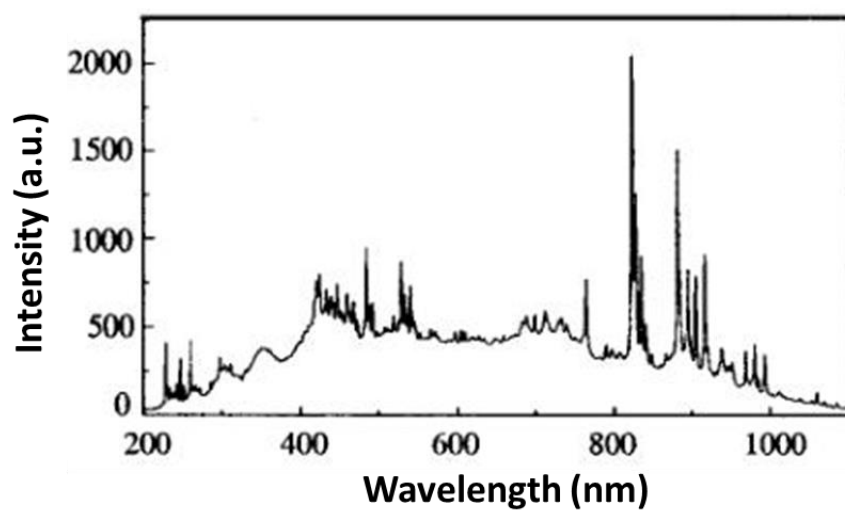

**Figure S1.** The emission spectrum of xenon lamp provided by perfectlight Co., Ltd.

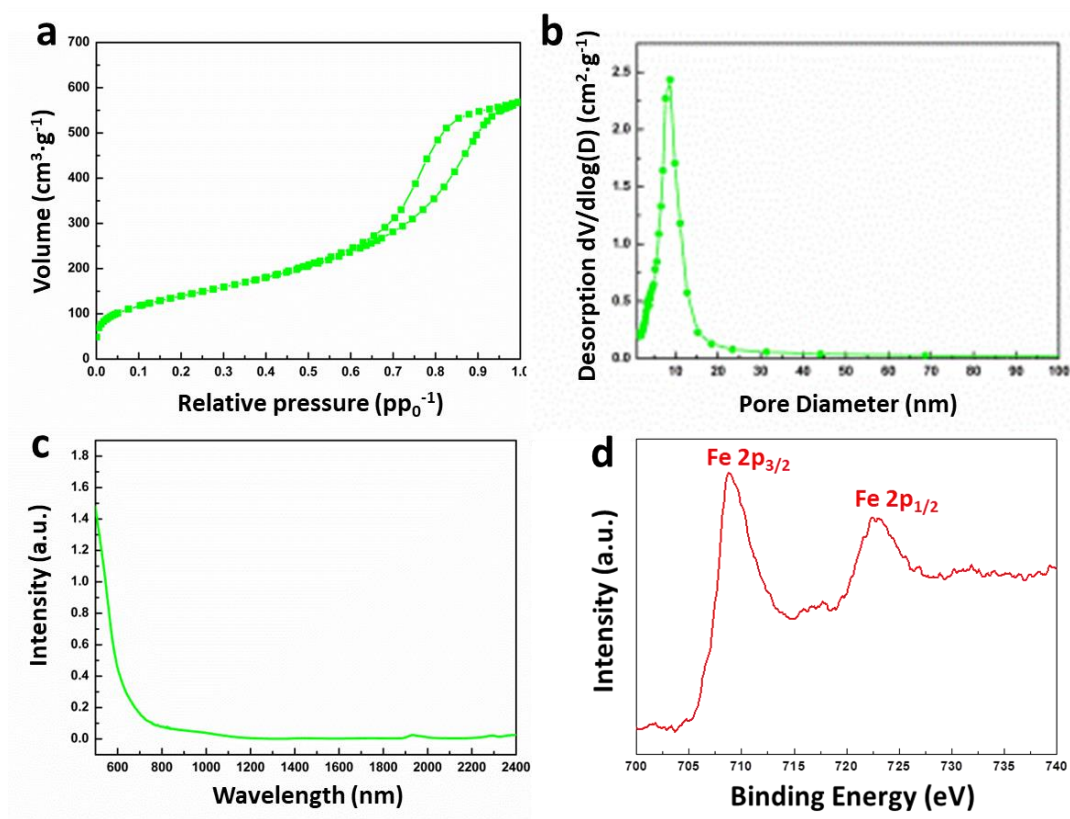

**Figure S2.** (a) Nitrogen adsorption and desorption isotherm, (b) pore size distribution (c) ultraviolet-Visible-Near Infrared absorption spectrum, (d) Fe 2p XPS spectrum of Fe-doped SiO<sub>2</sub> aerogel.

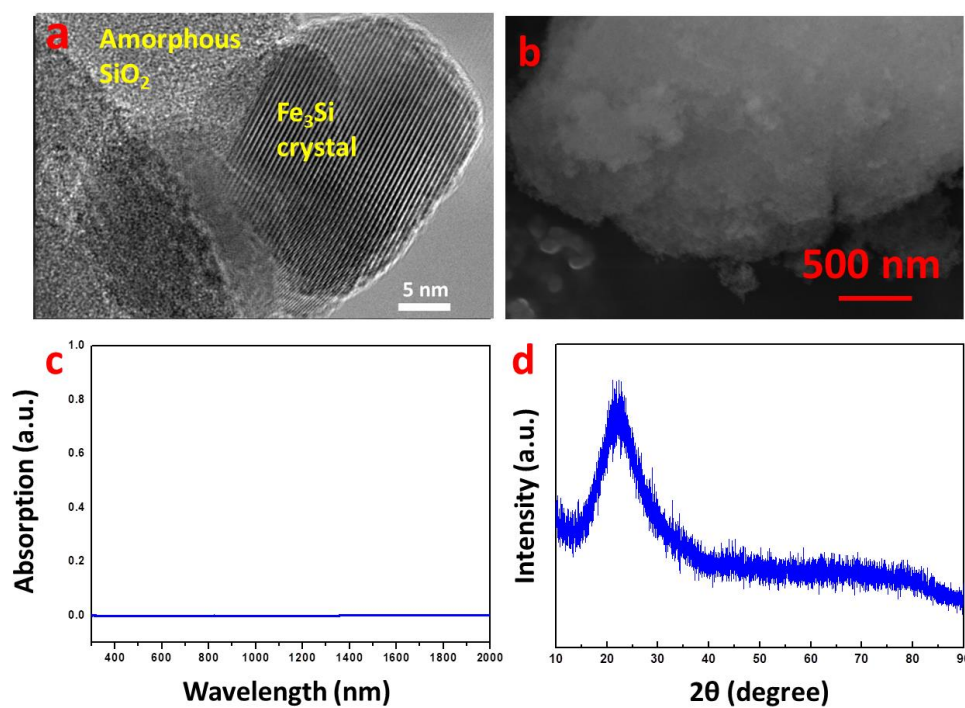

**Figure S3.** (a) HRTEM image of the interface between  $\text{Fe}_3\text{Si}$  crystal and amorphous  $\text{SiO}_2$  in  $\text{Fe}_3\text{Si}$  aerogel. (b) SEM image, (c) ultraviolet-visible-near infrared absorption spectrum, (d) XRD pattern of  $\text{SiO}_2$  aerogel.

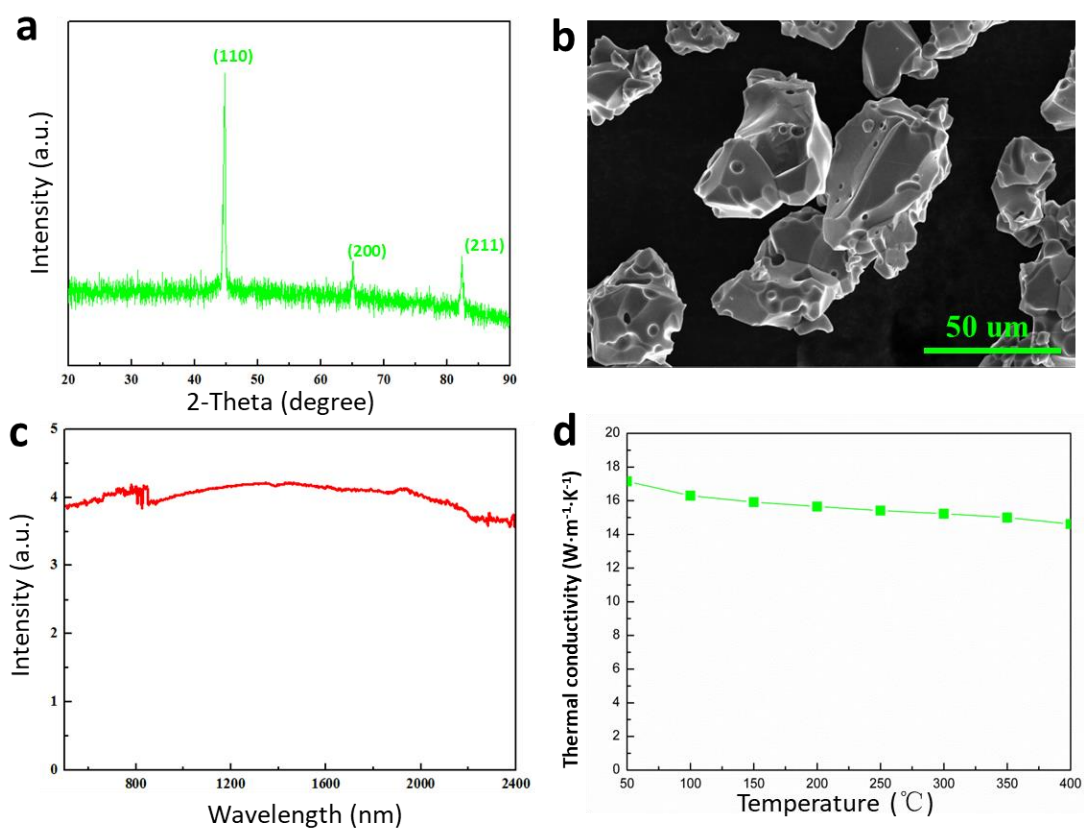

**Figure S4.** (a) XRD pattern, (b) SEM image, (c) ultraviolet-visible-near infrared absorption spectrum, (d) temperature-dependent total thermal conductivity of pure bulk Fe<sub>3</sub>Si particles.

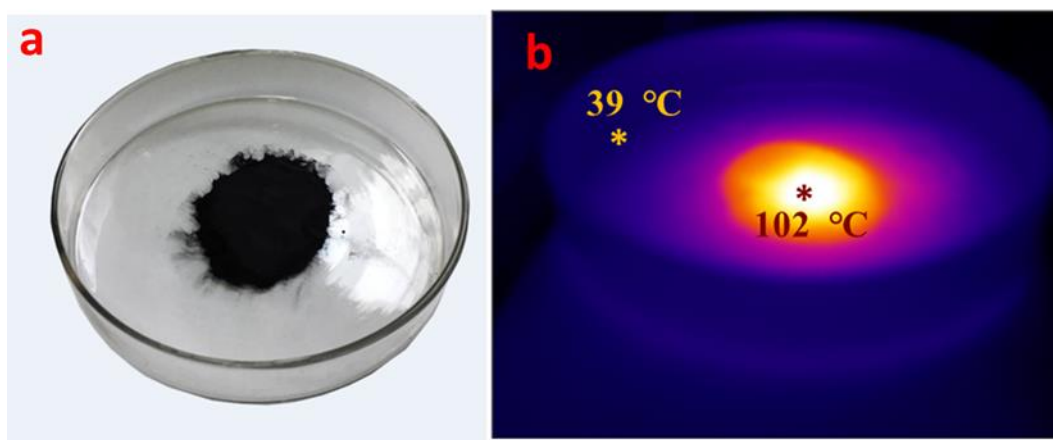

**Figure S5.** (a) Photograph of Fe<sub>3</sub>Si aerogel loaded in a glass dish, (b) the corresponding infra-red (IR) image with the irradiation of 1 kW m<sup>-2</sup> standard sunlight obtained by IR camera.

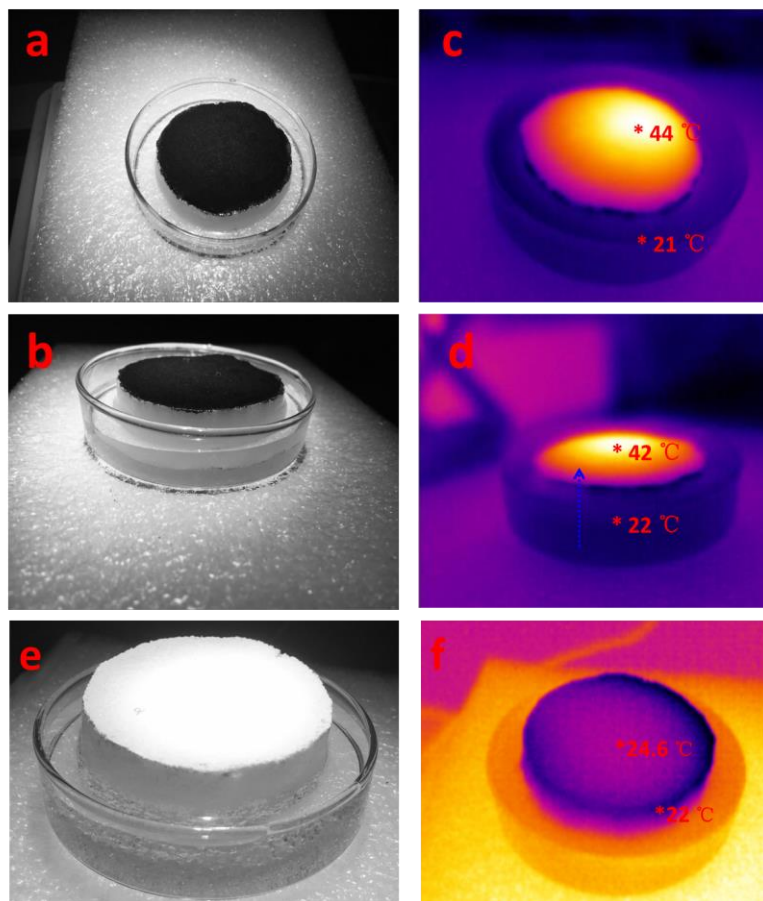

**Figure S6.** (a,b) Photographs and (c,d) corresponding top-view and side-view IR images of bulk Fe<sub>3</sub>Si aerogel supported on melamine foam in solar-vapor desalination unit after 10 minutes of  $1.0 \text{ kw}\cdot\text{m}^{-2}$  sunlight illumination. (e) Photograph and (f) IR image of SiO<sub>2</sub> aerogel supported on melamine foam in solar-vapor desalination unit after 10 minutes of  $1.0 \text{ kw}\cdot\text{m}^{-2}$  sunlight illumination.

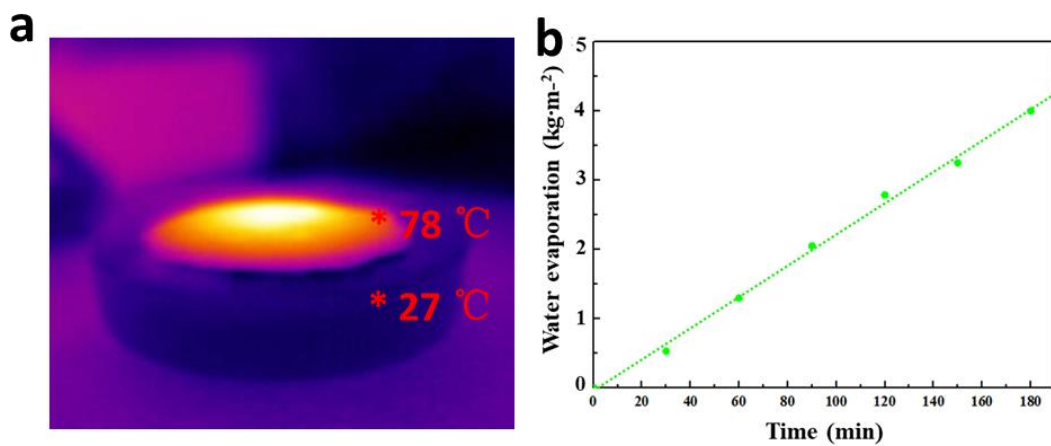

**Figure S7.** (a) Infrared (IR) image (obtained by IR camera) of hydrophobic Fe<sub>3</sub>Si aerogel/melamine foam in solar-vapor desalination unit after 5 minutes of 1.0 kw·m<sup>-2</sup> sunlight illumination. (b) The seawater evaporation performance of hydrophobic Fe<sub>3</sub>Si aerogel/melamine foam under 1.0 kw·m<sup>-2</sup> solar illumination.



**Table S1.** Water evaporation performance comparison of Fe<sub>3</sub>Si aerogel/melamine foam and other excellent photothermal materials under sunlight irradiation. The sunlight intensity is around 1000 W m<sup>-2</sup>.

| Materials                      | Supports     | Evaporation rate                       | ratio ( $\eta$ ) | Refs      |
|--------------------------------|--------------|----------------------------------------|------------------|-----------|
| PVA gel/PPy                    | none         | 3.2kg·m <sup>-2</sup> h <sup>-1</sup>  | 8                | 1         |
| Hollow carbon                  | none         | 1.45kg·m <sup>-2</sup> h <sup>-1</sup> | 2.9              | 2         |
| GO and CNTs                    | GO/cellulose | 1.25kg·m <sup>-2</sup> h <sup>-1</sup> | 3.125            | 3         |
| graphene foam                  | none         | 1.4kg·m <sup>-2</sup> h <sup>-1</sup>  | 3.5              | 4         |
| Ti <sub>2</sub> O <sub>3</sub> | cellulose    | 1.32kg·m <sup>-2</sup> h <sup>-1</sup> | 2.6              | 5         |
| Mg reduced TiO <sub>2</sub>    | SS mesh      | 0.8kg·m <sup>-2</sup> h <sup>-1</sup>  | 1.8              | 6         |
| Fe <sub>3</sub> Si aerogel     | none         | 2.08kg·m <sup>-2</sup> h <sup>-1</sup> | 6.71             | This work |

PVA: poly vinyl alcohol; PPy: polypyrrole; GO: graphene oxide; CNTs: carbon nanotubes; SS: stainless steel.

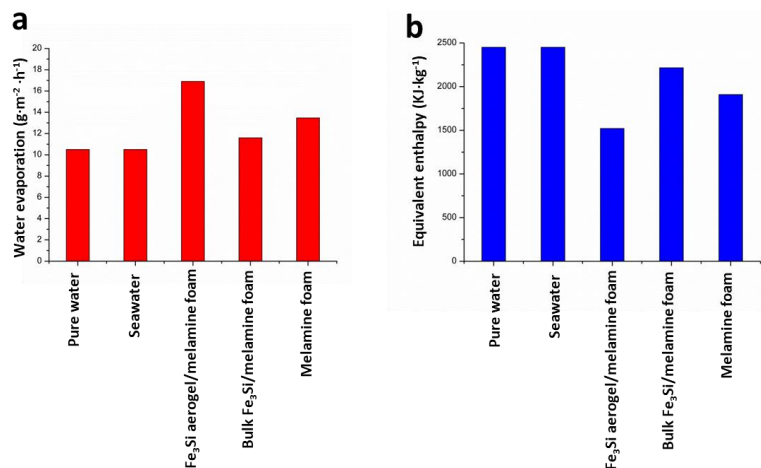

**Figure S8.** (a) Water evaporation rate under dark circumstances and (b) the corresponding calculated equivalent enthalpy in different conditions.

The calculation is in term of the equation below:

$$U = \Delta H_1 \cdot m_1 = \Delta H_2 \cdot m_2 \text{ (eq1)}$$

Where  $\Delta H_1$  and  $m_1$  were the evaporation enthalpy and water evaporation rate of pure water under dark circumstances.<sup>1</sup> The different water evaporation cells was put in same dark room at same time under a temperature of 23 °C, and the value of  $\Delta H_1$  was 2450  $\text{kJ} \cdot \text{kg}^{-1}$ .

**Table S2.** The seawater evaporation performance comparison of Fe<sub>3</sub>Si aerogel, bulk Fe<sub>3</sub>Si supported on melamine foam and self-floated Fe<sub>3</sub>Si aerogel (S-Fe<sub>3</sub>Si aerogel)

| Materials                    | Water evaporation mass<br>for 2 h (kg m <sup>-2</sup> ) | Latent heat (kJ/kg) | Temperature increase of water<br>Δ T (K) |
|------------------------------|---------------------------------------------------------|---------------------|------------------------------------------|
| Fe <sub>3</sub> Si aerogel   | 4.16                                                    | 1520                | 29                                       |
| Bulk Fe <sub>3</sub> Si      | 2.30                                                    | 2215                | 22                                       |
| S-Fe <sub>3</sub> Si aerogel | 1.49                                                    | 2295                | 61                                       |

To assess the effect of low thermal conductivity on the performance of seawater evaporation, the thermal efficiency (  $\eta$  ) was calculated in term of the equation below,<sup>1, 7</sup>:

$$\eta = Q_e / Q_s \quad (1)$$

where  $Q_s$  is the total solar irradiation energy in three hours, and  $Q_e$  is power consumed for seawater vapor generation in three hours, which can be estimated by the following equation,

$$Q_e = m \lambda + m C \Delta T$$

where  $m$  is the mass of seawater vapor,  $\lambda$  is the latent heat of the phase change,  $C$  is the specific heat capacity of water (4.2 J g<sup>-1</sup> K<sup>-1</sup>) and  $\Delta T$  is the temperature increase of the water. The detailed data for seawater evaporation were shown in Table S2. Fe<sub>3</sub>Si aerogel and bulk Fe<sub>3</sub>Si supported on melamine foam showed an efficiency of 91.8 % and 70.7 % under the 1.0 kW m<sup>-2</sup> of solar intensity.

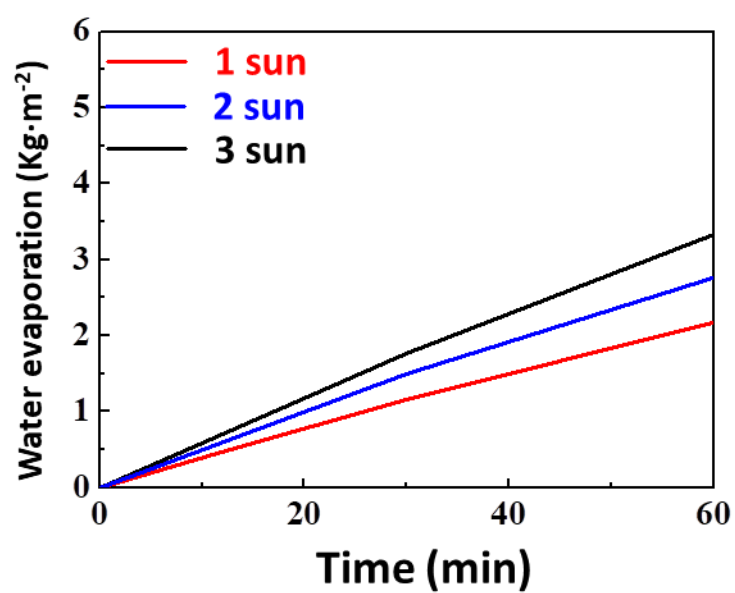

**Figure S9.** Seawater evaporation performance of Fe<sub>3</sub>Si aerogel/melamine foam under 1.0, 2.0 and 3.0 kw·m<sup>-2</sup> of sunlight irradiation (1 to 3 sun).

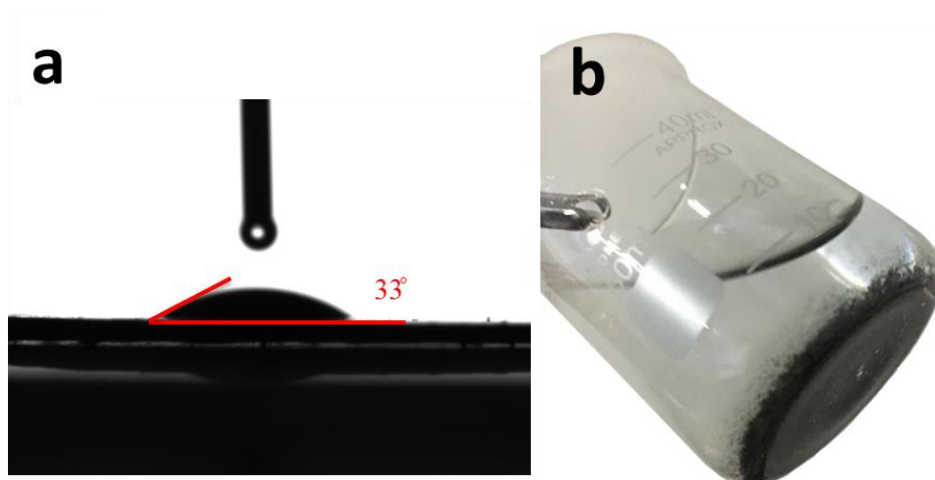

**Figure S10.** (a) The water contact angle of pristine  $\text{Fe}_3\text{Si}$  aerogel. A water droplet is loaded on the surface of a sample disc, which was prepared by pressing materials. (b) The picture of pristine  $\text{Fe}_3\text{Si}$  aerogel sink in water photographed by camera.

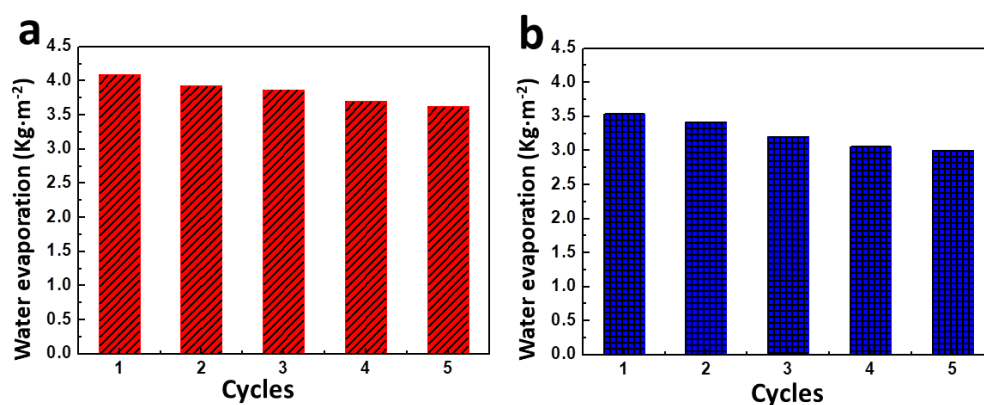

**Figure S11.** (a, b) The extra five-cycle water evaporation performances of hydrophobic Fe<sub>3</sub>Si aerogel floated on 0.5 M H<sub>2</sub>SO<sub>4</sub> and 1 M NaOH solutions, respectively, under 1.16 kw·m<sup>-2</sup> solar illumination. It is revealed that the water evaporation amounts of extra 5 cycles is gradually reduced from 4.05 to 3.55 Kg m<sup>-2</sup> in 0.5 M H<sub>2</sub>SO<sub>4</sub> solution and 3.50 to 3.07 Kg m<sup>-2</sup> in 1 M NaOH solution, both of which were almost similar to the first five-cycles of water evaporation performance, revealing the excellent stability of hydrophobic Fe<sub>3</sub>Si aerogel. The slight decrease of water evaporation rate during cycles test is possibly induced by the residual adsorption of H<sub>2</sub>SO<sub>4</sub> and NaOH on Fe<sub>3</sub>Si aerogel.

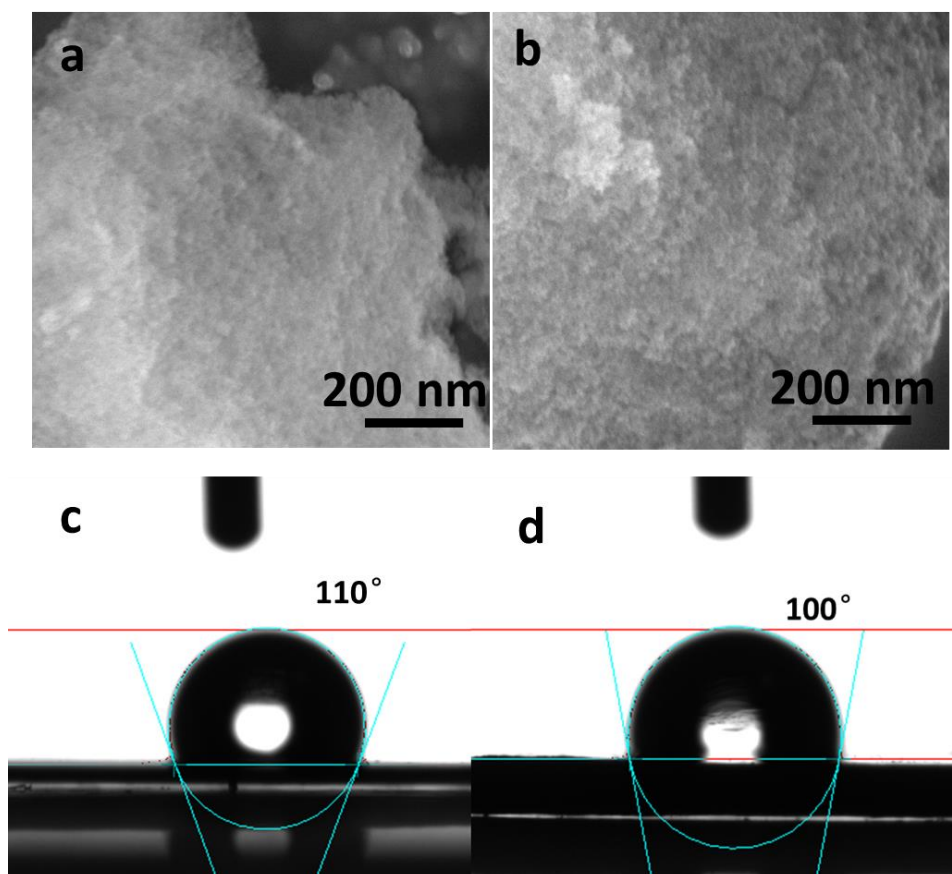

**Figure S12.** (a, b) SEM images of hydrophobic Fe<sub>3</sub>Si aerogel after 10 cycles of photothermal water evaporation from 0.5 M H<sub>2</sub>SO<sub>4</sub> and 1 M NaOH, respectively. The SEM images showed that hydrophobic Fe<sub>3</sub>Si aerogel still maintained porous structure of pristine Fe<sub>3</sub>Si aerogel, without any significant structure degradation. (c, d) Water contact angles of hydrophobic Fe<sub>3</sub>Si aerogel after 10 cycles of photothermal water evaporation from 0.5 M H<sub>2</sub>SO<sub>4</sub> (contact angle of 110°) and 1 M NaOH (100°), respectively. A water droplet is loaded on the surface of a sample disc prepared by pressing materials. In comparison with pristine hydrophobic Fe<sub>3</sub>Si aerogel of 110°, it is suggested that Fe<sub>3</sub>Si aerogel was more suitable for photothermal water evaporation from H<sub>2</sub>SO<sub>4</sub>.

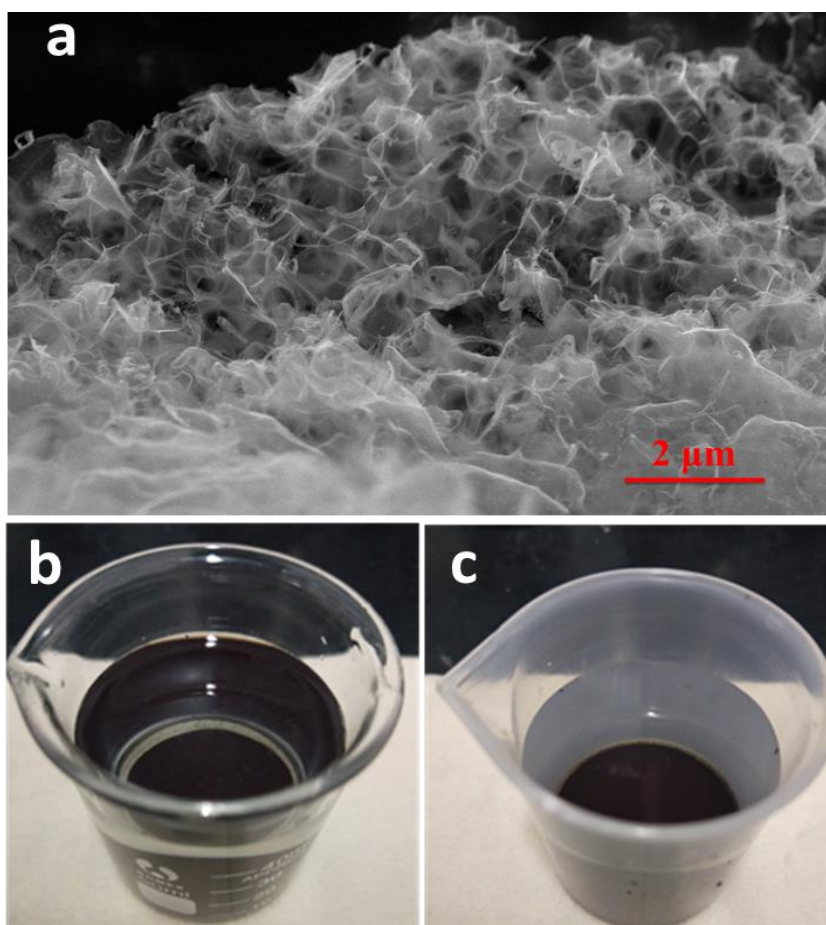

**Figure S13.** (a) SEM image of porous carbon. (b) and (c) Photographs of porous carbon loaded in 0.5 M  $\text{H}_2\text{SO}_4$  and 1 M  $\text{NaOH}$  solutions under  $1.16 \text{ kW}\cdot\text{m}^{-2}$  of sunlight illumination for 1 day. It is clearly seen that, after 1 day, porous carbon was completely deposited at the bottom of  $\text{H}_2\text{SO}_4$  and  $\text{NaOH}$  solutions, indicative of unapplicablity for the corrosive water evaporation.

Synthesis of porous carbon: 1 g of glucose was dissolved in 5 ml of  $\text{H}_2\text{O}$ , and subsequently added into 20 g of  $\text{NaCl}$  powder with agitation. After that, the mixture was treated by liquid nitrogen, freeze dried, and annealed in the tube furnace with  $\text{N}_2$  atmosphere of 100 sccm at  $1000^\circ\text{C}$  for 2 h. Porous carbon was obtained after washing the  $\text{NaCl}$  with deionized water three times.



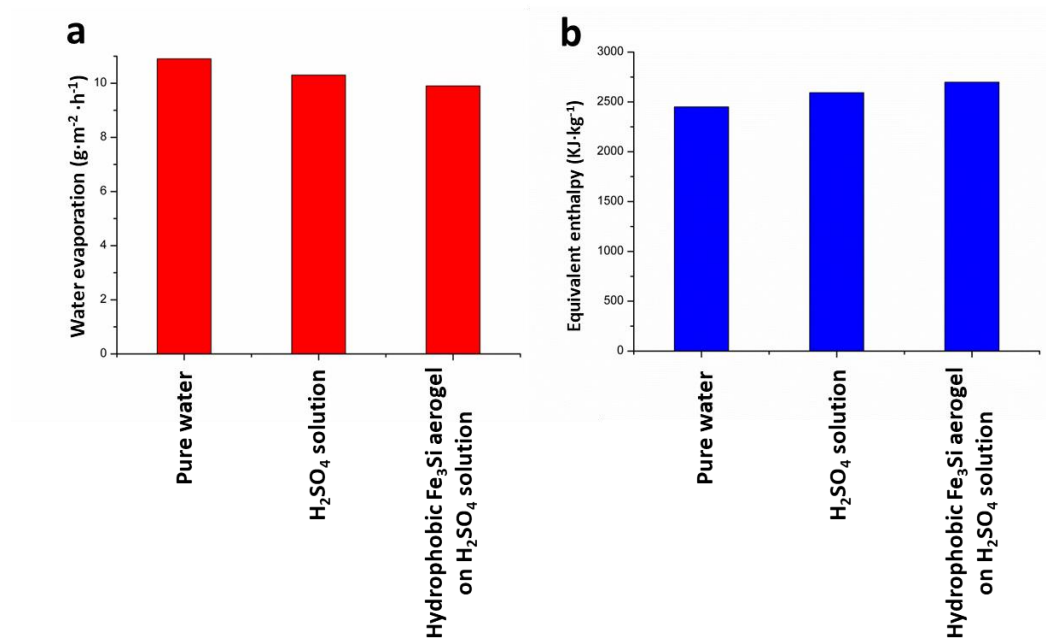

**Figure S14.** (a) Water evaporation rate under dark circumstances and (b) the corresponding calculated equivalent enthalpy in different conditions of pure water, 0.5 M of  $H_2SO_4$  solution, and hydrophobic  $Fe_3Si$  aerogel floated on  $H_2SO_4$  solution. Note that the different water evaporation cells were put in same dark room at same time under a temperature of 18  $^{\circ}C$ , and the value of  $\Delta H_1$  was  $2458 \text{ KJ kg}^{-1}$  under 18  $^{\circ}C$ .

---

### Calculation of Thermal Radiation Power

The heat loss of thermal radiation of Fe<sub>3</sub>Si aerogel on seawater, 0.5 M H<sub>2</sub>SO<sub>4</sub> and 1 M NaOH solution, respectively, was calculated based on Stefan-Boltzmann law:

$$j = \epsilon \sigma (T_2^4 - T_1^4).$$

Where  $j$  is the thermal radiation power,  $\sigma$  is the emissivity, and  $T$  is Kelvin temperature (K) of materials. The emissivity was 0.88 for Fe<sub>3</sub>Si aerogel. For seawater, 0.5 M H<sub>2</sub>SO<sub>4</sub> and 1 M NaOH solution, the ambient temperature was 23, 18, and 18 °C (296, 291, 291 K,  $T_1$ ), respectively, and the temperature of irradiated Fe<sub>3</sub>Si aerogel was 52, 84, and 84 °C (325, 357, 357 K,  $T_2$ ), respectively. Therefore, the calculated values  $j$  are 0.08, 0.44 and 0.44 KW m<sup>-2</sup> for seawater, 0.5 M H<sub>2</sub>SO<sub>4</sub> and 1M NaOH solution, respectively.

---

## References

1. F. Zhao, X. Zhou, Y. Shi, X. Qian, M. Alexander, X. Zhao, S. Mendez, R. Yang, L. Qu and G. Yu, *Nat. Nanotechnol.*, 2018, **13**, 489–495.
2. J. Zhou, Z. Sun, M. Chen, J. Wang, W. Qiao, D. Long and L. Ling, *Adv. Funct. Mater.*, 2016, **26**, 5368-5375.
3. Y. Li, T. Gao, Z. Yang, C. Chen, W. Luo, J. Song, E. Hitz, C. Jia, Y. Zhou, B. Liu, B. Yang and L. Hu, *Adv. Mater.*, 2017, **29**, 1700981.
4. H. Ren, M. Tang, B. Guan, K. Wang, J. Yang, F. Wang, M. Wang, J. Shan, Z. Chen, D. Wei, H. Peng and Z. Liu, *Adv. Mater.*, 2017, **29**, 1702590.
5. J. Wang, Y. Li, L. Deng, N. Wei, Y. Weng, S. Dong, D. Qi, J. Qiu, X. Chen and T. Wu, *Adv. Mater.*, 2017, **29**, 1603730.
6. M. Ye, J. Jia, Z. Wu, C. Qian, R. Chen, P. G. O'Brien, W. Sun, Y. Dong and G. A. Ozin, *Adv. Energy. Mater.*, 2017, **7**, 1601811.
7. G. Xue, K. Liu, Q. Chen, P. Yang, J. Li, T. Ding, J. Duan, B. Qi and J. Zhou, *ACS. Appl. Mater. Inter.*, 2017, **9**, 15052-15057.
